# Supplementary material for: Geographic Variation in Process and Outcomes of Care for Patients With Acute Myocardial Infarction in China From 2001 to 2015
Source: PubMed Central journal article supplement (PMC7584924; doi:10.1001/jamanetworkopen.2020.21182), 2020-10-23
Supplement: jamanetwopen-e2021182-s001.pdf [file jamanetwopen-e2021182-s001.pdf]

## Supplemental Online Content

Zhong Q, Gao y, Zheng X, et al. Geographic variation in process and outcomes of care for patients with acute myocardial infarction in China from 2001 to 2015. *JAMA Netw Open*. 2020;3(10):e2021182. doi:10.1001/jamanetworkopen.2020.21182

**eAppendix.** Ideal Candidates for the Treatments

**eTable 1.** Hospital Characteristics by Regions

**eTable 2.** Process of Care and Outcomes Among Patients with Acute Myocardial Infarction

**eTable 3.** Composite Utilization of Treatments Model

**eTable 4.** Composite Utilization of Treatments Models for Different Regions

**eTable 5.** In-hospital Mortality Model

**eTable 6.** In-hospital Mortality Models for Different Regions

**eTable 7.** Five-day Mortality Model

**eTable 8.** Five-day Mortality Models for Different Regions

**eTable 9.** Association Between Utilization of All Treatments and In-hospital Mortality in Different Regions

**eTable 10.** Association Between Utilization of All Treatments and 5-day Mortality in Different Regions

**eTable 11.** Ideal Candidates for Treatments among Patients with Acute Myocardial Infarction

This supplemental material has been provided by the authors to give readers additional information about their work.

## **eAppendix. Ideal Candidates for the Treatments**

For reperfusion therapy, we included patients who were admitted within 12 hours of symptom onset and did not receive reperfusion therapy before hospital presentation. We excluded patients with any contraindications (history of hemorrhagic stroke, active bleeding at presentation, or any other physician documented contraindications for fibrinolytic therapy if the patient was treated in a non-percutaneous coronary intervention [PCI]-capable hospital; allergy to contrast agents or any other documented contraindication to PCI if the patient was treated in a PCI-capable hospital).

For aspirin, we excluded patients with any contraindications for aspirin (allergy to aspirin, active bleeding on admission, history of hemorrhagic stroke, or other documented contraindications).

For clopidogrel, we excluded patients who participated in the Clopidogrel and Metoprolol in Myocardial Infarction Trial (COMMIT) and patients with any contraindications for clopidogrel (allergy to clopidogrel, active bleeding on admission, history of hemorrhagic stroke, or other documented contraindications).

For beta-blockers, we excluded patients who participated in the Clopidogrel and Metoprolol in Myocardial Infarction Trial (COMMIT) and patients with any contraindications for beta-blockers (allergy to beta-blockers, cardiogenic shock on admission, heart failure on admission, second- or third-degree atrioventricular block with no pacemaker implanted, systolic blood pressure <100 mmHg on admission, bradycardia [heart rate <60 beats/min] on admission without taking a beta-blocker, or other documented contraindications).

For angiotensin-converting enzyme inhibitors (ACEIs) or angiotensin receptor blockers (ARBs), we excluded patients with any contraindications for ACEIs (allergy to ACEIs, hyperkalemia [serum potassium >5.5 mmol/L during hospitalization], creatinine >265  $\mu$ mol/L during hospitalization, pregnancy or breast feeding, or other documented contraindications).

For statins, we excluded patients with any contraindications for statins (allergy to statins).

**eTable 1. Hospital Characteristics by Region**

| Hospital Characteristics, n (%)                | Western<br>(n=45) | Central<br>(n=48) | Eastern<br>(n=60) | P Value |
|------------------------------------------------|-------------------|-------------------|-------------------|---------|
| Level of hospital care <sup>a</sup>            |                   |                   |                   | 0.004   |
| Tertiary                                       | 18 (40.0)         | 12 (25.0)         | 34 (56.7)         |         |
| Secondary or lower                             | 27 (60.0)         | 36 (75.0)         | 26 (43.3)         |         |
| Type of hospital                               |                   |                   |                   | <0.001  |
| Medical college affiliated                     | 8 (17.8)          | 7 (14.6)          | 27 (45.0)         |         |
| Teaching, but not medical college affiliated   | 15 (33.3)         | 16 (33.3)         | 22 (36.7)         |         |
| Non-teaching                                   | 22 (48.9)         | 25 (52.1)         | 11 (18.3)         |         |
| CCU in hospital in 2011                        | 23 (51.1)         | 20 (41.7)         | 46 (76.7)         | 0.001   |
| Catheterization laboratory in hospital in 2011 | 18 (40.0)         | 18 (37.5)         | 41 (68.3)         | 0.002   |

CCU indicates coronary care unit.

<sup>a</sup>Hospitals in China are classified into three levels according to the standard of assessment established by the national health commission, based on hospital facilities and clinical capacities. Tertiary is the highest level.

**eTable 2. Process of Care and Outcomes Among Patients with Acute Myocardial Infarction**

|                                    | 2001-2006        |                  |                  |                  | P Value <sup>a</sup> | 2011-2015         |                  |                  |                   | P Value <sup>b</sup> |
|------------------------------------|------------------|------------------|------------------|------------------|----------------------|-------------------|------------------|------------------|-------------------|----------------------|
|                                    | Overall (n=6765) | Western (n=1173) | Central (n=1329) | Eastern (n=4263) |                      | Overall (n=20281) | Western (n=4403) | Central (n=5227) | Eastern (n=10651) |                      |
| <b>Process of Care<sup>c</sup></b> |                  |                  |                  |                  |                      |                   |                  |                  |                   |                      |
| Reperfusion <sup>d</sup> , n (%)   | 1395 (53.5)      | 238 (53.0)       | 225 (47.8)       | 932 (55.3)       | 0.02                 | 3460 (52.3)       | 730 (48.6)       | 790 (47.4)       | 1940 (56.3)       | <0.001               |
| Aspirin, n (%)                     | 5112 (84.0)      | 887 (84.6)       | 992 (84.1)       | 3233 (83.9)      | 0.86                 | 15465 (88.8)      | 3340 (88.6)      | 3996 (90.1)      | 8129 (88.2)       | 0.001                |
| Clopidogrel, n (%)                 | 1675 (28.1)      | 259 (24.8)       | 214 (18.4)       | 1202 (32.0)      | <0.001               | 9919 (56.7)       | 2380 (62.8)      | 2352 (52.9)      | 5187 (56.1)       | <0.001               |
| β-blocker, n (%)                   | 1596 (58.9)      | 305 (61.2)       | 312 (59.1)       | 979 (58.1)       | 0.45                 | 5567 (68.3)       | 1243 (68.7)      | 1436 (71.9)      | 2888 (66.6)       | <0.001               |
| ACEI/ARB, n (%)                    | 3988 (66.2)      | 702 (67.8)       | 778 (65.9)       | 2508 (65.9)      | 0.49                 | 10611 (62.3)      | 2385 (64.6)      | 2701 (62.3)      | 5525 (61.4)       | 0.003                |
| Statin, n (%)                      | 3595 (57.8)      | 668 (62.4)       | 564 (46.9)       | 2363 (59.9)      | <0.001               | 16599 (92.7)      | 3655 (94.2)      | 4182 (92.2)      | 8762 (92.3)       | <0.001               |
| Composite, n (%)                   | 17361 (58.6)     | 3059 (59.4)      | 3085 (53.9)      | 11217 (59.9)     | <0.001               | 61621 (72.8)      | 13733 (74.5)     | 15457 (72.2)     | 32431 (72.5)      | <0.001               |
| <b>Outcomes</b>                    |                  |                  |                  |                  |                      |                   |                  |                  |                   |                      |
| In-hospital mortality, n (%)       | 766 (11.3)       | 149 (12.7)       | 130 (9.8)        | 487 (11.4)       | 0.07                 | 1950 (9.6)        | 489 (11.1)       | 443 (8.5)        | 1018 (9.6)        | <0.001               |
| 5-day mortality, n (%)             | 600 (8.9)        | 122 (10.4)       | 106 (8.0)        | 372 (8.7)        | 0.09                 | 1499 (7.4)        | 400 (9.1)        | 349 (6.7)        | 750 (7.0)         | <0.001               |
| LOS, median (IQR), d               | 11 (6-16)        | 10 (5-17)        | 9 (5-14)         | 11 (6-17)        | <0.001               | 9 (6-14)          | 10 (5-14)        | 9 (5-13)         | 10 (6-14)         | <0.001               |

ACEI indicates angiotensin-converting enzyme inhibitor; ARB, angiotensin receptor blocker; IQR, interquartile range; LOS, length of stay.

<sup>a</sup> Test for difference among the Western, Central, and Eastern regions in 2001-2006.

<sup>b</sup> Test for difference among the Western, Central, and Eastern regions in 2011-2015.

<sup>c</sup> Use of treatment was calculated among ideal patients.

<sup>d</sup> Reperfusion rate was calculated among patients with ST-elevation myocardial infarction.

**eTable 3. Composite Utilization of Treatments Model**

| Characteristics                            | OR   | 95% CI    | P value |
|--------------------------------------------|------|-----------|---------|
| Age, every 5 years                         | 0.97 | 0.97-0.98 | <0.001  |
| Female                                     | 0.92 | 0.89-0.95 | <0.001  |
| Hypertension                               | 1.45 | 1.41-1.50 | <0.001  |
| Diabetes                                   | 1.14 | 1.10-1.19 | <0.001  |
| Dyslipidemia                               | 1.20 | 1.13-1.28 | <0.001  |
| Current smoker                             | 1.20 | 1.16-1.24 | <0.001  |
| History of CHD                             | 0.91 | 0.87-0.95 | <0.001  |
| Prior ischemic stroke                      | 0.92 | 0.88-0.97 | 0.001   |
| Prior myocardial infarction                | 1.10 | 1.03-1.17 | 0.003   |
| No chest discomfort                        | 0.60 | 0.57-0.64 | <0.001  |
| Renal dysfunction                          | 0.95 | 0.92-0.99 | 0.008   |
| LBBB                                       | 1.06 | 0.93-1.21 | 0.36    |
| Cardiac arrest                             | 0.92 | 0.79-1.07 | 0.26    |
| Cardiogenic shock                          | 0.96 | 0.89-1.04 | 0.30    |
| Acute stroke                               | 0.63 | 0.57-0.70 | <0.001  |
| Heart rate >90 beats/min                   | 0.91 | 0.88-0.95 | <0.001  |
| SBP <100 mm Hg                             | 0.79 | 0.75-0.84 | <0.001  |
| White blood cell count                     |      |           |         |
| 6000/ $\mu$ L-12 000/ $\mu$ L              | 1.20 | 1.16-1.25 | <0.001  |
| >12 000/ $\mu$ L                           | 1.21 | 1.15-1.26 | <0.001  |
| Years 2011-2015 <sup>a</sup>               | 2.06 | 1.91-2.23 | <0.001  |
| Region                                     |      |           | <0.001  |
| Eastern                                    | 1.02 | 0.95-1.10 |         |
| Central                                    | 0.83 | 0.76-0.91 |         |
| Western(Reference)                         | 1    | -         |         |
| Year*regeion                               |      |           | <0.001  |
| 2011-2015 <sup>a</sup> × Eastern           | 0.83 | 0.76-0.91 |         |
| 2011-2015 <sup>a</sup> × Central           | 1.05 | 0.94-1.16 |         |
| 2011-2015 <sup>a</sup> ×Western(Reference) | 1    | -         |         |

CHD indicates coronary heart disease; CI, confidence interval; LBBB, left bundle branch block; OR, odds ratio; SBP, systolic blood pressure.

<sup>a</sup> Patients in the years 2001-2006 were the reference group.

**eTable 4. Composite Utilization of Treatments Models for Different Regions**

| Characteristics               | Western |           |         | Central |           |         | Eastern |           |         |
|-------------------------------|---------|-----------|---------|---------|-----------|---------|---------|-----------|---------|
|                               | OR      | 95% CI    | P value | OR      | 95% CI    | P value | OR      | 95% CI    | P value |
| Age, every 5 years            | 0.95    | 0.94-0.97 | <0.001  | 0.97    | 0.95-0.98 | <0.001  | 0.98    | 0.97-0.99 | <0.001  |
| Female                        | 0.97    | 0.90-1.06 | 0.51    | 0.92    | 0.85-0.99 | 0.02    | 0.91    | 0.86-0.95 | <0.001  |
| Hypertension                  | 1.36    | 1.26-1.46 | <0.001  | 1.42    | 1.34-1.51 | <0.001  | 1.5     | 1.44-1.57 | <0.001  |
| Diabetes                      | 1.13    | 1.03-1.25 | 0.01    | 1.12    | 1.03-1.22 | 0.01    | 1.15    | 1.09-1.21 | <0.001  |
| Dyslipidemia                  | 1.19    | 1.02-1.40 | 0.03    | 1.12    | 0.97-1.29 | 0.13    | 1.23    | 1.13-1.33 | <0.001  |
| Current smoker                | 1.34    | 1.24-1.45 | <0.001  | 1.17    | 1.09-1.26 | <0.001  | 1.16    | 1.11-1.22 | <0.001  |
| History of CHD                | 0.97    | 0.87-1.08 | 0.59    | 0.95    | 0.87-1.03 | 0.23    | 0.87    | 0.82-0.92 | <0.001  |
| Prior ischemic stroke         | 0.99    | 0.88-1.12 | 0.89    | 0.97    | 0.87-1.07 | 0.51    | 0.88    | 0.83-0.94 | <0.001  |
| Prior myocardial infarction   | 1.03    | 0.89-1.20 | 0.69    | 1.04    | 0.92-1.18 | 0.56    | 1.14    | 1.05-1.23 | 0.002   |
| No chest discomfort           | 0.62    | 0.56-0.70 | <0.001  | 0.59    | 0.53-0.66 | <0.001  | 0.6     | 0.56-0.65 | <0.001  |
| Renal dysfunction             | 0.97    | 0.90-1.04 | 0.38    | 0.91    | 0.85-0.98 | 0.01    | 0.97    | 0.93-1.02 | 0.23    |
| LBBB                          | 1.25    | 0.95-1.64 | 0.11    | 0.99    | 0.76-1.29 | 0.94    | 1.01    | 0.84-1.21 | 0.91    |
| Cardiac arrest                | 0.76    | 0.53-1.08 | 0.13    | 0.80    | 0.58-1.11 | 0.18    | 1.03    | 0.84-1.25 | 0.80    |
| Cardiogenic shock             | 1.02    | 0.86-1.21 | 0.83    | 0.99    | 0.85-1.15 | 0.86    | 0.93    | 0.84-1.03 | 0.17    |
| Acute stroke                  | 0.58    | 0.46-0.72 | <0.001  | 0.82    | 0.68-0.99 | 0.04    | 0.58    | 0.50-0.67 | <0.001  |
| Heart rate >90 beats/min      | 0.87    | 0.80-0.94 | 0.001   | 0.91    | 0.85-0.98 | 0.02    | 0.93    | 0.89-0.98 | 0.005   |
| SBP <100 mm Hg                | 0.79    | 0.70-0.89 | <0.001  | 0.80    | 0.72-0.89 | <0.001  | 0.78    | 0.72-0.85 | <0.001  |
| White blood cell count        |         |           |         |         |           |         |         |           |         |
| 6000/ $\mu$ L-12 000/ $\mu$ L | 1.18    | 1.08-1.30 | <0.001  | 1.18    | 1.10-1.27 | <0.001  | 1.22    | 1.16-1.28 | <0.001  |
| >12 000/ $\mu$ L              | 1.16    | 1.04-1.29 | 0.01    | 1.2     | 1.10-1.32 | <0.001  | 1.23    | 1.15-1.31 | <0.001  |
| Years 2011-2015 <sup>a</sup>  | 2.10    | 1.94-2.28 | <0.001  | 2.15    | 2.00-2.30 | <0.001  | 1.71    | 1.64-1.79 | <0.001  |

CHD indicates coronary heart disease; CI, confidence interval; LBBB, left bundle branch block; OR, odds ratio; SBP, systolic blood pressure.

<sup>a</sup> Patients in the years 2001-2006 were the reference group.

**eTable 5. In-hospital Mortality Model**

| Characteristics                             | OR   | 95% CI    | P value |
|---------------------------------------------|------|-----------|---------|
| Age, every 5 years                          | 1.23 | 1.20-1.25 | <0.001  |
| Female                                      | 1.29 | 1.18-1.41 | <0.001  |
| Hypertension                                | 0.88 | 0.81-0.96 | 0.004   |
| Diabetes                                    | 1.28 | 1.16-1.42 | <0.001  |
| Dyslipidemia                                | 0.77 | 0.63-0.94 | 0.01    |
| Current smoker                              | 0.64 | 0.57-0.71 | <0.001  |
| History of CHD                              | 0.99 | 0.88-1.11 | 0.89    |
| Prior ischemic stroke                       | 1.32 | 1.18-1.49 | <0.001  |
| Prior myocardial infarction                 | 0.94 | 0.80-1.10 | 0.44    |
| No chest discomfort                         | 1.35 | 1.20-1.52 | <0.001  |
| Renal dysfunction                           | 1.70 | 1.56-1.86 | <0.001  |
| LBBB                                        | 1.18 | 0.90-1.55 | 0.24    |
| Cardiac arrest                              | 2.47 | 1.89-3.23 | <0.001  |
| Cardiogenic shock                           | 3.12 | 2.75-3.54 | <0.001  |
| Acute stroke                                | 2.24 | 1.84-2.74 | <0.001  |
| Heart rate >90 beats/min                    | 1.78 | 1.63-1.94 | <0.001  |
| SBP <100 mm Hg                              | 2.44 | 2.18-2.73 | <0.001  |
| White blood cell count                      |      |           |         |
| 6000/ $\mu$ L-12 000/ $\mu$ L               | 0.65 | 0.58-0.72 | <0.001  |
| >12 000/ $\mu$ L                            | 1.34 | 1.19-1.50 | <0.001  |
| Years 2011-2015 <sup>a</sup>                | 0.77 | 0.63-0.95 | 0.01    |
| Region                                      |      |           | 0.059   |
| Eastern                                     | 0.80 | 0.62-1.05 |         |
| Central                                     | 0.68 | 0.50-0.93 |         |
| Western(Reference)                          | 1    | -         |         |
| Year*region                                 |      |           | 0.805   |
| 2011-2015 <sup>a</sup> × Eastern            | 1.04 | 0.82-1.32 |         |
| 2011-2015 <sup>a</sup> × Central            | 0.97 | 0.72-1.30 |         |
| 2011-2015 <sup>a</sup> × Western(Reference) | 1    | -         |         |

CHD indicates coronary heart disease; CI, confidence interval; LBBB, left bundle branch block; OR, odds ratio; SBP, systolic blood pressure.

<sup>a</sup> Patients in the years 2001-2006 were the reference group.

**eTable 6. In-hospital Mortality Models for Different Regions**

| Characteristics              | Western |           |         | Central |           |         | Eastern |           |         |
|------------------------------|---------|-----------|---------|---------|-----------|---------|---------|-----------|---------|
|                              | OR      | 95% CI    | P value | OR      | 95% CI    | P value | OR      | 95% CI    | P value |
| Age, every 5 years           | 1.18    | 1.13-1.23 | <0.001  | 1.24    | 1.19-1.30 | <0.001  | 1.24    | 1.21-1.28 | <0.001  |
| Female                       | 1.45    | 1.20-1.76 | <0.001  | 1.19    | 0.97-1.45 | 0.10    | 1.28    | 1.13-1.43 | <0.001  |
| Hypertension                 | 0.89    | 0.74-1.07 | 0.20    | 0.94    | 0.78-1.14 | 0.52    | 0.85    | 0.75-0.95 | 0.005   |
| Diabetes                     | 1.32    | 1.06-1.65 | 0.01    | 1.50    | 1.20-1.89 | <0.001  | 1.21    | 1.06-1.38 | 0.005   |
| Dyslipidemia                 | 0.74    | 0.48-1.15 | 0.18    | 0.69    | 0.42-1.13 | 0.14    | 0.79    | 0.61-1.01 | 0.06    |
| Current smoker               | 0.62    | 0.49-0.79 | <0.001  | 0.67    | 0.52-0.86 | 0.002   | 0.63    | 0.54-0.73 | <0.001  |
| History of CHD               | 1.05    | 0.80-1.37 | 0.73    | 0.89    | 0.69-1.14 | 0.34    | 1.02    | 0.88-1.19 | 0.76    |
| Prior ischemic stroke        | 1.39    | 1.05-1.83 | 0.02    | 1.37    | 1.05-1.78 | 0.02    | 1.30    | 1.12-1.51 | <0.001  |
| Prior myocardial infarction  | 1.02    | 0.70-1.48 | 0.92    | 0.80    | 0.53-1.18 | 0.26    | 0.94    | 0.76-1.15 | 0.54    |
| No chest discomfort          | 1.29    | 1.02-1.65 | 0.04    | 1.61    | 1.25-2.08 | <0.001  | 1.28    | 1.09-1.50 | 0.002   |
| Renal dysfunction            | 1.72    | 1.43-2.08 | <0.001  | 1.63    | 1.34-1.98 | <0.001  | 1.73    | 1.54-1.95 | <0.001  |
| LBBB                         | 1.26    | 0.73-2.17 | 0.40    | 1.85    | 1.07-3.17 | 0.03    | 0.92    | 0.62-1.37 | 0.69    |
| Cardiac arrest               | 1.36    | 0.71-2.59 | 0.35    | 3.97    | 2.25-7.00 | <0.001  | 2.52    | 1.78-3.57 | <0.001  |
| Cardiogenic shock            | 3.15    | 2.39-4.17 | <0.001  | 3.40    | 2.60-4.46 | <0.001  | 3.03    | 2.56-3.59 | <0.001  |
| Acute stroke                 | 2.32    | 1.52-3.53 | <0.001  | 1.84    | 1.22-2.79 | 0.004   | 2.41    | 1.83-3.17 | <0.001  |
| Heart rate >90 beats/min     | 1.70    | 1.41-2.04 | <0.001  | 1.93    | 1.60-2.33 | <0.001  | 1.76    | 1.57-1.98 | <0.001  |
| SBP <100 mm Hg               | 2.22    | 1.75-2.80 | <0.001  | 2.62    | 2.06-3.33 | <0.001  | 2.43    | 2.09-2.84 | <0.001  |
| White blood cell count       |         |           |         |         |           |         |         |           |         |
| 6000/μL-12 000/μL            | 0.65    | 0.51-0.82 | <0.001  | 0.76    | 0.60-0.96 | 0.02    | 0.62    | 0.54-0.72 | <0.001  |
| >12 000/μL                   | 1.35    | 1.05-1.74 | 0.02    | 1.42    | 1.10-1.83 | 0.01    | 1.31    | 1.12-1.53 | 0.001   |
| Years 2011-2015 <sup>a</sup> | 0.78    | 0.63-0.96 | 0.02    | 0.72    | 0.58-0.90 | 0.004   | 0.81    | 0.72-0.91 | 0.001   |

CHD indicates coronary heart disease; CI, confidence interval; LBBB, left bundle branch block; OR, odds ratio; SBP, systolic blood pressure.

<sup>a</sup> Patients in the years 2001-2006 were the reference group.



**eTable 7. Five-day Mortality Model**

| Characteristics                             | OR   | 95% CI    | P value |
|---------------------------------------------|------|-----------|---------|
| Age, every 5 years                          | 1.20 | 1.17-1.23 | <0.001  |
| Female                                      | 1.34 | 1.21-1.48 | <0.001  |
| Hypertension                                | 0.83 | 0.75-0.91 | <0.001  |
| Diabetes                                    | 1.21 | 1.08-1.36 | 0.001   |
| Dyslipidemia                                | 0.71 | 0.56-0.90 | 0.004   |
| Current smoker                              | 0.61 | 0.54-0.70 | <0.001  |
| History of CHD                              | 0.92 | 0.81-1.05 | 0.22    |
| Prior ischemic stroke                       | 1.18 | 1.03-1.35 | 0.02    |
| Prior myocardial infarction                 | 0.89 | 0.73-1.07 | 0.22    |
| No chest discomfort                         | 1.23 | 1.08-1.40 | 0.002   |
| Renal dysfunction                           | 1.50 | 1.36-1.65 | <0.001  |
| LBBB                                        | 1.02 | 0.74-1.39 | 0.91    |
| Cardiac arrest                              | 2.38 | 1.79-3.15 | <0.001  |
| Cardiogenic shock                           | 3.38 | 2.96-3.86 | <0.001  |
| Acute stroke                                | 2.11 | 1.69-2.63 | <0.001  |
| Heart rate >90 beats/min                    | 1.81 | 1.64-1.99 | <0.001  |
| SBP <100 mm Hg                              | 2.85 | 2.53-3.22 | <0.001  |
| White blood cell count                      |      |           |         |
| 6000/ $\mu$ L-12 000/ $\mu$ L               | 0.58 | 0.52-0.65 | <0.001  |
| >12 000/ $\mu$ L                            | 1.15 | 1.01-1.31 | 0.03    |
| Years 2011-2015 <sup>a</sup>                | 0.80 | 0.64-1.00 | 0.05    |
| Region                                      |      |           | 0.040   |
| Eastern                                     | 0.76 | 0.57-1.00 |         |
| Central                                     | 0.66 | 0.47-0.92 |         |
| Western(Reference)                          | 1    | -         |         |
| Year*region                                 |      |           | 0.983   |
| 2011-2015 <sup>a</sup> × Eastern            | 1.01 | 0.78-1.31 |         |
| 2011-2015 <sup>a</sup> × Central            | 0.98 | 0.71-1.36 |         |
| 2011-2015 <sup>a</sup> × Western(Reference) | 1    | -         |         |

CHD indicates coronary heart disease; CI, confidence interval; LBBB, left bundle branch block; OR, odds ratio; SBP, systolic blood pressure.

<sup>a</sup> Patients in the years 2001-2006 were the reference group.

**eTable 8. Five-day Mortality Models for Different Regions**

| Characteristics               | Western |           |         | Central |           |         | Eastern |           |         |
|-------------------------------|---------|-----------|---------|---------|-----------|---------|---------|-----------|---------|
|                               | OR      | 95% CI    | P value | OR      | 95% CI    | P value | OR      | 95% CI    | P value |
| Age, every 5 years            | 1.17    | 1.12-1.23 | <0.001  | 1.20    | 1.14-1.26 | <0.001  | 1.21    | 1.18-1.25 | <0.001  |
| Female                        | 1.51    | 1.23-1.86 | <0.001  | 1.23    | 0.99-1.53 | 0.068   | 1.32    | 1.16-1.51 | <0.001  |
| Hypertension                  | 0.82    | 0.67-1.01 | 0.06    | 0.84    | 0.68-1.04 | 0.106   | 0.82    | 0.72-0.94 | 0.004   |
| Diabetes                      | 1.41    | 1.10-1.79 | 0.01    | 1.37    | 1.06-1.77 | 0.016   | 1.10    | 0.94-1.28 | 0.23    |
| Dyslipidemia                  | 0.63    | 0.37-1.07 | 0.09    | 0.71    | 0.40-1.25 | 0.231   | 0.72    | 0.53-0.98 | 0.04    |
| Current smoker                | 0.55    | 0.42-0.71 | <0.001  | 0.64    | 0.48-0.84 | 0.001   | 0.64    | 0.54-0.76 | <0.001  |
| History of CHD                | 0.92    | 0.68-1.25 | 0.60    | 0.84    | 0.63-1.11 | 0.219   | 0.96    | 0.81-1.14 | 0.64    |
| Prior ischemic stroke         | 1.20    | 0.88-1.64 | 0.26    | 1.26    | 0.94-1.69 | 0.125   | 1.15    | 0.96-1.37 | 0.12    |
| Prior myocardial infarction   | 0.93    | 0.61-1.44 | 0.76    | 0.75    | 0.48-1.20 | 0.230   | 0.90    | 0.71-1.15 | 0.40    |
| No chest discomfort           | 1.15    | 0.88-1.50 | 0.31    | 1.56    | 1.18-2.06 | 0.002   | 1.16    | 0.96-1.39 | 0.12    |
| Renal dysfunction             | 1.51    | 1.23-1.86 | <0.001  | 1.47    | 1.18-1.82 | <0.001  | 1.52    | 1.33-1.75 | <0.001  |
| LBBB                          | 0.79    | 0.40-1.54 | 0.48    | 1.95    | 1.10-3.47 | 0.023   | 0.82    | 0.52-1.30 | 0.40    |
| Cardiac arrest                | 1.35    | 0.69-2.66 | 0.39    | 2.72    | 1.47-5.02 | 0.001   | 2.70    | 1.88-3.88 | <0.001  |
| Cardiogenic shock             | 3.63    | 2.71-4.85 | <0.001  | 3.76    | 2.85-4.96 | <0.001  | 3.17    | 2.65-3.80 | <0.001  |
| Acute stroke                  | 2.84    | 1.82-4.42 | <0.001  | 1.71    | 1.08-2.71 | 0.023   | 1.97    | 1.44-2.70 | <0.001  |
| Heart rate >90 beats/min      | 1.67    | 1.37-2.05 | <0.001  | 2.04    | 1.66-2.50 | <0.001  | 1.79    | 1.57-2.05 | <0.001  |
| SBP <100 mm Hg                | 2.39    | 1.86-3.07 | <0.001  | 2.94    | 2.28-3.78 | <0.001  | 3.01    | 2.56-3.54 | <0.001  |
| White blood cell count        |         |           |         |         |           |         |         |           |         |
| 6000/ $\mu$ L-12 000/ $\mu$ L | 0.68    | 0.52-0.88 | 0.003   | 0.64    | 0.49-0.82 | 0.001   | 0.52    | 0.45-0.61 | <0.001  |
| >12 000/ $\mu$ L              | 1.27    | 0.96-1.68 | 0.09    | 1.16    | 0.88-1.52 | 0.290   | 1.10    | 0.93-1.31 | 0.28    |
| Years 2011-2015 <sup>a</sup>  | 0.78    | 0.62-0.99 | 0.04    | 0.78    | 0.61-1.00 | 0.051   | 0.82    | 0.72-0.94 | 0.01    |

CHD indicates coronary heart disease; CI, confidence interval; LBBB, left bundle branch block; OR, odds ratio; SBP, systolic blood pressure.

<sup>a</sup> Patients in the years 2001-2006 were the reference group.

**eTable 9. Association Between Utilization of All Treatments and In-hospital Mortality in Different Regions**

| Characteristics                       | In-hospital Mortality |           |         |         |            |         |         |           |         |
|---------------------------------------|-----------------------|-----------|---------|---------|------------|---------|---------|-----------|---------|
|                                       | Western               |           |         | Central |            |         | Eastern |           |         |
|                                       | OR                    | 95% CI    | P value | OR      | 95% CI     | P value | OR      | 95% CI    | P value |
| Age, every 5 years                    | 1.20                  | 1.14-1.27 | <0.001  | 1.27    | 1.20-1.34  | <0.001  | 1.26    | 1.22-1.30 | <0.001  |
| Female                                | 1.53                  | 1.21-1.94 | <0.001  | 1.36    | 1.06-1.75  | 0.02    | 1.30    | 1.13-1.51 | <0.001  |
| Hypertension                          | 0.97                  | 0.77-1.22 | 0.79    | 1.01    | 0.80-1.28  | 0.93    | 0.85    | 0.73-0.98 | 0.02    |
| Diabetes                              | 1.29                  | 0.98-1.69 | 0.07    | 1.74    | 1.32-2.31  | <0.001  | 1.26    | 1.08-1.47 | 0.004   |
| Dyslipidemia                          | 0.97                  | 0.60-1.57 | 0.90    | 0.60    | 0.33-1.08  | 0.09    | 0.93    | 0.71-1.22 | 0.61    |
| Current smoker                        | 0.87                  | 0.66-1.14 | 0.31    | 0.83    | 0.60-1.14  | 0.24    | 0.80    | 0.67-0.96 | 0.02    |
| History of CHD                        | 1.13                  | 0.82-1.55 | 0.46    | 1.00    | 0.74-1.35  | 0.99    | 1.24    | 1.04-1.47 | 0.02    |
| Prior ischemic stroke                 | 1.59                  | 1.16-2.17 | 0.004   | 1.35    | 0.98-1.85  | 0.07    | 1.33    | 1.12-1.58 | 0.001   |
| Prior myocardial infarction           | 1.21                  | 0.79-1.86 | 0.37    | 0.83    | 0.52-1.32  | 0.44    | 0.86    | 0.68-1.09 | 0.21    |
| No chest discomfort                   | 1.28                  | 0.96-1.71 | 0.09    | 1.73    | 1.27-2.35  | 0.001   | 1.29    | 1.07-1.55 | 0.01    |
| Renal dysfunction                     | 2.01                  | 1.59-2.52 | <0.001  | 2.10    | 1.64-2.69  | <0.001  | 2.13    | 1.84-2.45 | <0.001  |
| LBBB                                  | 1.54                  | 0.83-2.88 | 0.17    | 1.80    | 0.92-3.56  | 0.09    | 1.08    | 0.68-1.72 | 0.73    |
| Cardiac arrest                        | 0.43                  | 0.13-1.43 | 0.17    | 5.47    | 2.65-11.28 | <0.001  | 1.99    | 1.22-3.25 | 0.01    |
| Cardiogenic shock                     | 1.78                  | 1.20-2.66 | 0.01    | 2.03    | 1.37-3.02  | 0.001   | 2.02    | 1.62-2.53 | <0.001  |
| Acute stroke                          | 1.80                  | 1.09-2.98 | 0.02    | 1.83    | 1.11-3.03  | 0.02    | 3.01    | 2.24-4.04 | <0.001  |
| Heart rate >90 beats/min              | 1.52                  | 1.21-1.91 | <0.001  | 1.68    | 1.32-2.13  | <0.001  | 1.66    | 1.45-1.91 | <0.001  |
| SBP <100 mm Hg                        | 1.48                  | 1.08-2.03 | 0.02    | 1.55    | 1.10-2.18  | 0.01    | 1.54    | 1.25-1.90 | <0.001  |
| White blood cell count                |                       |           |         |         |            |         |         |           |         |
| 6000/ $\mu$ L-12 000/ $\mu$ L         | 0.97                  | 0.71-1.33 | 0.86    | 1.18    | 0.86-1.63  | 0.30    | 0.94    | 0.78-1.13 | 0.50    |
| >12 000/ $\mu$ L                      | 1.96                  | 1.40-2.74 | <0.001  | 2.18    | 1.55-3.07  | <0.001  | 2.04    | 1.66-2.49 | <0.001  |
| Receiving all treatments <sup>a</sup> | 0.50                  | 0.37-0.67 | <0.001  | 0.49    | 0.35-0.69  | <0.001  | 0.62    | 0.52-0.74 | <0.001  |

CHD indicates coronary heart disease; CI, confidence interval; LBBB, left bundle branch block; OR, odds ratio; SBP, systolic blood pressure.

<sup>a</sup> Use of treatment determined among ideal patients.

**eTable 10. Association Between Utilization of All Treatments and 5-day Mortality in Different Regions**

| Characteristics                       | 5-day Mortality |           |         |         |           |         |         |           |         |
|---------------------------------------|-----------------|-----------|---------|---------|-----------|---------|---------|-----------|---------|
|                                       | Western         |           |         | Central |           |         | Eastern |           |         |
|                                       | OR              | 95% CI    | P value | OR      | 95% CI    | P value | OR      | 95% CI    | P value |
| Age, every 5 years                    | 1.21            | 1.13-1.29 | <0.001  | 1.23    | 1.15-1.32 | <0.001  | 1.25    | 1.20-1.30 | <0.001  |
| Female                                | 1.69            | 1.28-2.23 | <0.001  | 1.57    | 1.16-2.13 | 0.004   | 1.42    | 1.19-1.70 | <0.001  |
| Hypertension                          | 0.89            | 0.68-1.17 | 0.41    | 0.88    | 0.66-1.17 | 0.37    | 0.79    | 0.66-0.94 | 0.01    |
| Diabetes                              | 1.44            | 1.05-1.98 | 0.03    | 1.51    | 1.07-2.14 | 0.02    | 1.15    | 0.94-1.39 | 0.18    |
| Dyslipidemia                          | 0.87            | 0.47-1.60 | 0.65    | 0.62    | 0.29-1.31 | 0.21    | 0.93    | 0.65-1.33 | 0.68    |
| Current smoker                        | 0.88            | 0.63-1.22 | 0.45    | 0.87    | 0.59-1.28 | 0.47    | 0.95    | 0.77-1.18 | 0.65    |
| History of CHD                        | 0.96            | 0.65-1.43 | 0.86    | 0.94    | 0.65-1.37 | 0.76    | 1.25    | 1.01-1.54 | 0.04    |
| Prior ischemic stroke                 | 1.36            | 0.93-1.99 | 0.11    | 1.29    | 0.87-1.91 | 0.20    | 1.13    | 0.90-1.41 | 0.29    |
| Prior myocardial infarction           | 1.14            | 0.66-1.95 | 0.65    | 0.93    | 0.53-1.63 | 0.79    | 0.76    | 0.56-1.03 | 0.07    |
| No chest discomfort                   | 1.10            | 0.78-1.56 | 0.58    | 1.71    | 1.18-2.46 | 0.004   | 1.15    | 0.91-1.45 | 0.24    |
| Renal dysfunction                     | 1.68            | 1.28-2.21 | <0.001  | 2.10    | 1.56-2.84 | <0.001  | 2.02    | 1.69-2.42 | <0.001  |
| LBBB                                  | 0.68            | 0.25-1.83 | 0.45    | 1.97    | 0.91-4.27 | 0.09    | 0.93    | 0.52-1.67 | 0.82    |
| Cardiac arrest                        | 0.20            | 0.03-1.39 | 0.11    | 2.87    | 1.13-7.30 | 0.03    | 2.23    | 1.29-3.85 | 0.004   |
| Cardiogenic shock                     | 2.20            | 1.41-3.44 | 0.001   | 2.31    | 1.48-3.59 | <0.001  | 1.99    | 1.53-2.58 | <0.001  |
| Acute stroke                          | 2.36            | 1.36-4.09 | 0.002   | 1.46    | 0.77-2.77 | 0.24    | 2.75    | 1.93-3.90 | <0.001  |
| Heart rate >90 beats/min              | 1.40            | 1.06-1.84 | 0.02    | 1.62    | 1.21-2.16 | 0.001   | 1.71    | 1.44-2.04 | <0.001  |
| SBP <100 mm Hg                        | 1.49            | 1.03-2.15 | 0.04    | 1.55    | 1.04-2.30 | 0.03    | 2.00    | 1.58-2.53 | <0.001  |
| White blood cell count                |                 |           |         |         |           |         |         |           |         |
| 6000/μL-12 000/μL                     | 1.28            | 0.87-1.90 | 0.21    | 1.03    | 0.71-1.50 | 0.88    | 0.86    | 0.68-1.08 | 0.20    |
| >12 000/μL                            | 2.21            | 1.45-3.38 | <0.001  | 1.79    | 1.19-2.67 | 0.01    | 1.89    | 1.48-2.42 | <0.001  |
| Receiving all treatments <sup>a</sup> | 0.41            | 0.28-0.59 | <0.001  | 0.27    | 0.16-0.45 | <0.001  | 0.57    | 0.45-0.73 | <0.001  |

CHD indicates coronary heart disease; CI, confidence interval; LBBB, left bundle branch block; OR, odds ratio; SBP, systolic blood pressure.

<sup>a</sup> Use of treatment determined among ideal patients.

**eTable 11. Ideal Candidates for Treatments among Patients with Acute Myocardial Infarction**

| Process of Care <sup>a</sup>     | 2001-2006   |             |              | P Value <sup>b</sup> | 2011-2015    |              |             | P Value <sup>b</sup> |
|----------------------------------|-------------|-------------|--------------|----------------------|--------------|--------------|-------------|----------------------|
|                                  | Western     | Central     | Eastern      |                      | Western      | Central      | Eastern     |                      |
| Reperfusion <sup>c</sup> , n (%) | 449 (38.3)  | 471 (35.4)  | 1686 (39.6)  | 0.03                 | 1502 (34.1)  | 1667 (31.9)  | 3445 (32.3) | 0.05                 |
| Aspirin, n (%)                   | 1049 (89.4) | 1179 (88.7) | 3855 (90.4)  | 0.16                 | 3769 (85.6)  | 4435 (84.8)  | 9217 (86.5) | 0.01                 |
| Clopidogrel, n (%)               | 1045 (89.1) | 1160 (87.3) | 3759 (88.2)  | 0.38                 | 3787 (86)    | 4449 (85.1)  | 9254 (86.9) | 0.01                 |
| β-blocker, n (%)                 | 498 (42.5)  | 528 (39.7)  | 1685 (39.5)  | 0.19                 | 1810 (41.1)  | 1997 (38.2)  | 4339 (40.7) | 0.003                |
| ACEI/ARB, n (%)                  | 1035 (88.2) | 1180 (88.8) | 3806 (89.3)  | 0.58                 | 3690 (83.8)  | 4337 (83)    | 8994 (84.4) | 0.06                 |
| Statin, n (%)                    | 1070 (91.2) | 1203 (90.5) | 3945 (92.5)  | 0.04                 | 3878 (88.1)  | 4537 (86.8)  | 9494 (89.1) | <.001                |
| Composite, n (%)                 | 5146 (73.1) | 5721 (71.8) | 18736 (73.3) | 0.03                 | 18436 (69.8) | 21422 (68.3) | 44743 (70)  | <.001                |

ACEI indicates angiotensin-converting enzyme inhibitor; ARB, angiotensin receptor blocker.

<sup>a</sup> Use of treatment was calculated among ideal patients.

<sup>b</sup> Test for difference among the western, central, and eastern regions.

<sup>c</sup> Reperfusion rate was calculated among patients with ST-elevation myocardial infarction
